# Supplementary material
Source: PubMed Central journal article supplement (PMC6431272)

**Table S1:** Distributions of candidate clinical variables for multivariable regression

|                                       | All<br>(N = 400) | No AKI or Stage 1<br>(N = 386) | Stage 2 or 3<br>(N = 14) | P-value |
|---------------------------------------|------------------|--------------------------------|--------------------------|---------|
| Age (years)                           |                  |                                |                          | 0.04    |
| mean (sd)                             | 65.8 (12.7)      | 66.1 (12.7)                    | 59.1 (12.8)              |         |
| median                                | 67               | 67                             | 59                       |         |
| IQR                                   | 23 , 92          | 58 , 75                        | 51.2 , 69                |         |
| Female                                | 131 (33%)        | 125 (32%)                      | 6 (43%)                  | 0.40    |
| Medical history                       |                  |                                |                          |         |
| CHF                                   | 163 (40.8%)      | 156 (40.4%)                    | 7 (50.0%)                | 0.58    |
| Current smoker                        | 67 (16.8%)       | 66 (17.1%)                     | 1 (7.1%)                 | 0.48    |
| Diabetes mellitus                     | 123 (30.8%)      | 120 (31.1%)                    | 3 (21.4%)                | 0.56    |
| Cardiac surgery                       | 74 (18.5%)       | 69 (17.9%)                     | 5 (35.7%)                | 0.15    |
| Cardiac catheterization*              | 148 (37.0%)      | 144 (37.3%)                    | 4 (28.6%)                | 0.59    |
| BMI (kg/m <sup>2</sup> ) <sup>†</sup> |                  |                                |                          | 0.10    |
| mean (sd)                             | 28.5 (6.1)       | 28.4 (5.9)                     | 33.2 (9.9)               |         |
| Median                                | 27.4             | 27.3                           | 31.7                     |         |
| IQR                                   | 15.2 , 54.1      | 24.7 , 31                      | 23.9 , 39.3              |         |
| Charlson index                        |                  |                                |                          | 0.12    |
| mean (sd)                             | 2.4 (1.9)        | 2.4 (1.9)                      | 3.1 (2)                  |         |
| median                                | 2                | 2                              | 4                        |         |
| IQR                                   | 0 , 9            | 1 , 4                          | 1 , 4.8                  |         |
| Baseline SCr                          |                  |                                |                          | 0.14    |
| mean (sd)                             | 1.1 (0.5)        | 1.1 (0.4)                      | 1.8 (1.2)                |         |
| Median                                | 1                | 1                              | 1.4                      |         |
| IQR                                   | 0.5 , 4.4        | 0.8 , 1.2                      | 0.8 , 2.8                |         |
| Baseline eGFR <sup>§</sup>            |                  |                                |                          | 0.08    |
| mean (sd)                             | 70.2 (22.8)      | 70.7 (22)                      | 56.6 (37.1)              |         |
| median                                | 72.3             | 72.9                           | 45.8                     |         |
| IQR                                   | 11.6 , 123.2     | 54.3 , 87.9                    | 22.9 , 83.2              |         |
| CKD stage                             |                  |                                |                          | 0.07    |
| mean (sd)                             | 2.2 (0.8)        | 2.2 (0.8)                      | 2.6 (1.2)                |         |
| median                                | 2                | 2                              | 3                        |         |
| IQR                                   | 1 , 4            | 2 , 3                          | 2 , 3.8                  |         |
| Thakar score <sup>†</sup>             |                  |                                |                          | <0.001  |
| mean (sd)                             | 1.9 (1.3)        | 1.9 (1.2)                      | 3.7 (2)                  |         |
| Median                                | 1                | 1                              | 3                        |         |
| IQR                                   | 1 , 6            | 1 , 3                          | 3 , 6                    |         |
| Baseline hematocrit <sup>†</sup>      |                  |                                |                          | <0.001  |
| mean (sd)                             | 39.3 (5)         | 39.5 (4.9)                     | 34 (5.8)                 |         |
| median                                | 40               | 40                             | 33.5                     |         |
| IQR                                   | 26 , 52          | 37 , 43                        | 31 , 36.8                |         |
| Procedure                             |                  |                                |                          |         |
| Isolated CABG                         | 131 (32.8%)      | 127 (32.9%)                    | 4 (28.6%)                | 0.74    |
| Isolated valve                        | 168 (42.0%)      | 165 (42.7%)                    | 3 (1.4%)                 | 0.11    |
| CABG/valve                            | 61 (15.3%)       | 58 (15.0%)                     | 3 (21.4%)                | 0.51    |
| Aorta                                 | 40 (10.0%)       | 36 (9.3%)                      | 4 (28.6%)                | 0.04    |
| CPB use                               | 283 (70.8%)      | 272 (70.5%)                    | 11 (78.6%)               | 0.77    |

\*Within 10 days of surgery; <sup>†</sup>Selected by LASSO regression for multivariable modeling; <sup>§</sup>Calculated by CKD-EPI equation; IQR, interquartile range; SCr, serum creatinine; eGFR, estimated glomerular filtration rate; CKD, chronic kidney disease;

**Table S2:** Perioperative 10<sup>th</sup>, 25<sup>th</sup>, 50<sup>th</sup> (median), 75<sup>th</sup>, and 90<sup>th</sup> percentiles of [TIMP-2]•[IGFBP7] and percentages of patients greater than the 0.3 and 2.0 thresholds. P-values represent [TIMP-2]•[IGFBP7] distribution comparisons against No AKI patients using the Conover test.

| AKI           | Timepoint                             | N   | 10%  | 25%  | 50%  | 75%  | 90%   | % > 0.3 | % > 2.0 | P-value |
|---------------|---------------------------------------|-----|------|------|------|------|-------|---------|---------|---------|
| No AKI        | Induction of anesthesia               | 309 | 0.02 | 0.04 | 0.11 | 0.28 | 0.58  | 24%     | 3%      |         |
| No AKI        | 30 min after start of CPB or OpCAB    | 309 | 0.02 | 0.06 | 0.17 | 0.41 | 0.86  | 33%     | 3%      |         |
| No AKI        | Immediately after end of CPB or OpCAB | 309 | 0.04 | 0.08 | 0.20 | 0.57 | 1.50  | 37%     | 6%      |         |
| No AKI        | ICU admission                         | 309 | 0.02 | 0.04 | 0.10 | 0.23 | 0.51  | 20%     | 3%      |         |
| No AKI        | Six hours after ICU admission         | 309 | 0.03 | 0.09 | 0.18 | 0.38 | 0.68  | 33%     | 1%      |         |
| No AKI        | Post-op day 1                         | 309 | 0.02 | 0.05 | 0.18 | 0.42 | 1.18  | 31%     | 5%      |         |
| No AKI        | Post-op day 2                         | 309 | 0.03 | 0.05 | 0.13 | 0.31 | 0.81  | 29%     | 2%      |         |
| No AKI        | Post-op day 3                         | 309 | 0.03 | 0.05 | 0.12 | 0.29 | 0.53  | 24%     | 1%      |         |
| Stage 1 AKI   | Induction of anesthesia               | 77  | 0.02 | 0.03 | 0.11 | 0.26 | 0.74  | 21%     | 3%      | 1.00    |
| Stage 1 AKI   | 30 min after start of CPB or OpCAB    | 77  | 0.02 | 0.06 | 0.17 | 0.35 | 1.32  | 33%     | 6%      | 1.00    |
| Stage 1 AKI   | Immediately after end of CPB or OpCAB | 77  | 0.06 | 0.10 | 0.26 | 0.58 | 1.79  | 43%     | 10%     | 0.17    |
| Stage 1 AKI   | ICU admission                         | 77  | 0.03 | 0.06 | 0.12 | 0.43 | 0.83  | 28%     | 6%      | 0.09    |
| Stage 1 AKI   | Six hours after ICU admission         | 77  | 0.04 | 0.17 | 0.32 | 0.62 | 1.16  | 51%     | 7%      | 0.01    |
| Stage 1 AKI   | Post-op day 1                         | 77  | 0.02 | 0.05 | 0.18 | 0.82 | 1.97  | 43%     | 10%     | 0.35    |
| Stage 1 AKI   | Post-op day 2                         | 77  | 0.02 | 0.05 | 0.14 | 0.46 | 1.24  | 35%     | 6%      | 0.40    |
| Stage 1 AKI   | Post-op day 3                         | 77  | 0.03 | 0.05 | 0.10 | 0.28 | 0.58  | 24%     | 2%      | 0.97    |
| Stage 2-3 AKI | Induction of anesthesia               | 14  | 0.02 | 0.04 | 0.12 | 0.28 | 3.84  | 21%     | 14%     | 1.00    |
| Stage 2-3 AKI | 30 min after start of CPB or OpCAB    | 14  | 0.03 | 0.07 | 0.14 | 0.24 | 1.28  | 21%     | 7%      | 1.00    |
| Stage 2-3 AKI | Immediately after end of CPB or OpCAB | 14  | 0.18 | 0.42 | 0.45 | 0.87 | 3.66  | 85%     | 15%     | 0.02    |
| Stage 2-3 AKI | ICU admission                         | 14  | 0.08 | 0.12 | 0.26 | 0.33 | 1.03  | 31%     | 8%      | 0.06    |
| Stage 2-3 AKI | Six hours after ICU admission         | 14  | 0.11 | 0.56 | 1.45 | 2.20 | 10.08 | 73%     | 27%     | 0.002   |
| Stage 2-3 AKI | Post-op day 1                         | 14  | 0.05 | 0.21 | 1.58 | 2.13 | 9.13  | 67%     | 33%     | 0.006   |
| Stage 2-3 AKI | Post-op day 2                         | 14  | 0.07 | 0.09 | 0.20 | 1.83 | 9.29  | 46%     | 23%     | 0.19    |
| Stage 2-3 AKI | Post-op day 3                         | 14  | 0.05 | 0.06 | 0.57 | 1.33 | 13.49 | 56%     | 11%     | 0.37    |

Kruskal-Wallis test was performed at each timepoint to test for global differences of [TIMP-2]•[IGFBP7] concentrations among the three groups. Conover test was employed for pairwise multiple comparisons when appropriate. P values for pairwise multiple comparisons were adjusted by the Holm method.

**Table S3.** Effect of atorvastatin administration on  $\log_{10}([\text{TIMP-2}] \cdot [\text{IGFBP7}])$  levels at each timepoint. Estimates calculated by linear regression. P-values represent the affect of atorvastatin treatment on  $[\text{TIMP-2}] \cdot [\text{IGFBP7}]$  at each timepoint.

| Timepoint                             | Estimate (95% CI)  | P-value |
|---------------------------------------|--------------------|---------|
| Induction of anesthesia (baseline)    | 0.06 (-0.06-0.18)  | 0.34    |
| 30 min after start of CPB or OpCAB    | 0.05 (-0.08-0.17)  | 0.47    |
| Immediately after end of CPB or OpCAB | -0.05 (-0.17-0.07) | 0.43    |
| ICU admission                         | -0.05 (-0.17-0.07) | 0.41    |
| Six hours after ICU admission         | 0.03 (-0.09-0.13)  | 0.57    |
| Postoperative day 1                   | -0.09 (-0.23-0.05) | 0.23    |
| Postoperative day 2                   | 0.09 (-0.04-0.22)  | 0.17    |
| Postoperative day 3                   | 0.03 (-0.10-0.16)  | 0.64    |

CPB, cardiopulmonary bypass; OpCAB, off-pump coronary artery bypass; ICU, intensive care unit

**Table S4.** In-hospital outcomes in all patients and those with [TIMP-2]•[IGFBP7] concentrations  $\leq 0.3$ ,  $>0.3$  to  $\leq 2.0$ , and  $>2.0$  (ng/mL)<sup>2</sup>/1000 at induction of anesthesia, immediately after end of CPB or OpCAB, at ICU admission, and 6 hours after ICU admission. Continuous variables are represented as median (25<sup>th</sup>-75<sup>th</sup> percentiles), and categorical variables as number (percent). P-values compare outcome distributions among patients grouped by [TIMP-2]•[IGFBP7] categories and represent Kruskal-Wallis test for continuous variables and Chi-squared test for categorical variables.

| Induction of anesthesia               | [TIMP-2]•[IGFBP7] |            |                      |              | P-value |
|---------------------------------------|-------------------|------------|----------------------|--------------|---------|
|                                       | All               | $\leq 0.3$ | $>0.3$ to $\leq 2.0$ | $>2.0$       |         |
| N                                     | 390               | 299        | 78                   | 13           | --      |
| ICU LOS, days                         | 3 (2-24)          | 3 (2-5)    | 3 (2-5)              | 4 (3-6.5)    | 0.31    |
| Hospital LOS, days                    | 8 (4-38)          | 7 (6-9)    | 8 (6-9)              | 8.5 (6.8-9)  | 0.61    |
| ICU readmission                       | 16 (4.0%)         | 13 (4.3%)  | 3 (3.8%)             | 0 (0%)       | 1.00    |
| Stage 2 or 3 AKI*                     | 14 (3.5%)         | 11 (3.7%)  | 1 (1.3%)             | 2 (15.4%)    | 0.06    |
| Dialysis                              | 7 (1.8%)          | 4 (1.3%)   | 1 (1.3%)             | 2 (15.4%)    | 0.03    |
| Death                                 | 5 (1.2%)          | 3 (1%)     | 0 (0%)               | 2 (15.4%)    | 0.01    |
| Immediately after end of CPB or OpCAB | [TIMP-2]•[IGFBP7] |            |                      |              | P-value |
|                                       | All               | $\leq 0.3$ | $>0.3$ to $\leq 2.0$ | $>2.0$       |         |
| N                                     | 382               | 231        | 123                  | 28           | --      |
| ICU LOS, days                         | 3 (2-24)          | 3 (2-5)    | 3 (2-5)              | 4 (2.8-5)    | 0.84    |
| Hospital LOS, days                    | 7 (4-38)          | 8 (6-10)   | 7 (6-9)              | 7 (6-8.2)    | 0.41    |
| ICU readmission                       | 16 (4%)           | 10 (4.3%)  | 4 (3.3%)             | 1 (3.6%)     | 0.91    |
| Stage 2 or 3 AKI*                     | 14 (3.5%)         | 2 (0.9%)   | 9 (7.3%)             | 2 (7.1%)     | 0.002   |
| Dialysis                              | 7 (1.8%)          | 1 (0.4%)   | 4 (3.3%)             | 1 (3.6%)     | 0.05    |
| Death                                 | 5 (1.2%)          | 1 (0.4%)   | 1 (0.8%)             | 1 (3.6%)     | 0.24    |
| ICU admission                         | [TIMP-2]•[IGFBP7] |            |                      |              | P-value |
|                                       | All               | $\leq 0.3$ | $>0.3$ to $\leq 2.0$ | $>2.0$       |         |
| N                                     | 391               | 305        | 73                   | 13           | --      |
| ICU LOS, days                         | 3 (2-24)          | 3 (2-5)    | 4 (2-5)              | 3 (3-5)      | 0.65    |
| Hospital LOS, days                    | 7 (4-38)          | 8 (6-9)    | 7 (6-9)              | 8 (7-9)      | 0.86    |
| ICU readmission                       | 16 (4.0%)         | 14 (4.6%)  | 2 (2.7%)             | 0 (0.0%)     | 0.85    |
| Stage 2 or 3 AKI*                     | 14 (3.5%)         | 9 (3%)     | 3 (4.1%)             | 1 (7.7%)     | 0.37    |
| Dialysis                              | 7 (1.8%)          | 3 (1%)     | 1 (1.4%)             | 1 (7.7%)     | 0.14    |
| Death                                 | 5 (1.2%)          | 2 (0.7%)   | 0 (0%)               | 1 (7.7%)     | 0.10    |
| Six hours after ICU admission         | [TIMP-2]•[IGFBP7] |            |                      |              | P-value |
|                                       | All               | $\leq 0.3$ | $>0.3$ to $\leq 2.0$ | $>2.0$       |         |
| N                                     | 357               | 223        | 124                  | 10           | --      |
| ICU LOS, days                         | 3 (2-21)          | 3 (2-4.8)  | 4 (3-5)              | 5 (4.2-6.8)  | 0.006   |
| Hospital LOS, days                    | 7.5 (4-38)        | 7 (6-9)    | 8 (6-9)              | 8.5 (7-11.8) | 0.18    |
| ICU readmission                       | 16 (4.0%)         | 10 (4.5%)  | 3 (2.4%)             | 0 (0%)       | 0.58    |
| Stage 2 or 3 AKI*                     | 14 (3.5%)         | 3 (1.3%)   | 5 (4.0%)             | 3 (30.0%)    | <0.001  |
| Dialysis                              | 7 (1.8%)          | 3 (1.3%)   | 0 (0%)               | 3 (30.0%)    | <0.001  |
| Death                                 | 5 (1.2%)          | 1 (0.4%)   | 1 (0.8%)             | 1 (10.0%)    | 0.08    |

\*Within 48 hours of surgery. LOS, length of stay

**Table S5.** AUROC, sensitivity, specificity, positive predictive value (PPV), and negative predictive value (NPV) of [TIMP-2]•[IGFBP7] with corresponding 95% CI at each timepoint for prediction of stage 2 or 3 AKI within 48 hours of surgery with 0.3 and 2.0 thresholds.

| Timepoint                                                   | AUROC               | cutoff of 0.3 [TIMP-]•[IGFBP7] |                     |                     |                     | cutoff of 2.0 [TIMP-]•[IGFBP7] |                     |                     |                     |
|-------------------------------------------------------------|---------------------|--------------------------------|---------------------|---------------------|---------------------|--------------------------------|---------------------|---------------------|---------------------|
|                                                             |                     | sens                           | spec                | ppv                 | npv                 | sens                           | spec                | ppv                 | npv                 |
| Induction of anesthesia                                     | 0.53<br>(0.37-0.69) | 0.21<br>(0.05-0.51)            | 0.77<br>(0.72-0.81) | 0.03<br>(0.01-0.09) | 0.96<br>(0.94-0.98) | 0.14<br>(0.02-0.43)            | 0.97<br>(0.95-0.99) | 0.15<br>(0.02-0.45) | 0.97<br>(0.95-0.98) |
| 30 min after start of CPB or OpCAB                          | 0.52<br>(0.36-0.68) | 0.21<br>(0.05-0.51)            | 0.67<br>(0.62-0.72) | 0.02<br>(0.00-0.07) | 0.96<br>(0.92-0.98) | 0.07<br>(0.00-0.34)            | 0.97<br>(0.94-0.98) | 0.08<br>(0.00-0.36) | 0.96<br>(0.94-0.98) |
| Immediately after end of CPB or OpCAB                       | 0.71<br>(0.58-0.82) | 0.85<br>(0.55-0.98)            | 0.62<br>(0.57-0.67) | 0.07<br>(0.04-0.13) | 0.99<br>(0.97-1.00) | 0.15<br>(0.02-0.45)            | 0.93<br>(0.90-0.95) | 0.07<br>(0.01-0.24) | 0.97<br>(0.95-0.98) |
| ICU admission                                               | 0.68<br>(0.54-0.81) | 0.31<br>(0.09-0.61)            | 0.78<br>(0.74-0.82) | 0.05<br>(0.01-0.11) | 0.97<br>(0.94-0.99) | 0.08<br>(0.00-0.36)            | 0.97<br>(0.95-0.98) | 0.08<br>(0.00-0.36) | 0.97<br>(0.95-0.98) |
| Six hours after ICU admission                               | 0.78<br>(0.58-0.93) | 0.73<br>(0.39-0.94)            | 0.64<br>(0.58-0.69) | 0.06<br>(0.03-0.11) | 0.99<br>(0.96-1.00) | 0.27<br>(0.06-0.61)            | 0.98<br>(0.96-0.99) | 0.30<br>(0.07-0.65) | 0.98<br>(0.96-0.99) |
| Post-op day 1                                               | 0.75<br>(0.59-0.90) | 0.67<br>(0.35-0.90)            | 0.67<br>(0.62-0.71) | 0.06<br>(0.03-0.12) | 0.98<br>(0.96-1.00) | 0.33<br>(0.10-0.65)            | 0.94<br>(0.91-0.96) | 0.15<br>(0.04-0.35) | 0.98<br>(0.96-0.99) |
| Post-op day 2                                               | 0.65<br>(0.48-0.81) | 0.46<br>(0.19-0.75)            | 0.70<br>(0.65-0.75) | 0.06<br>(0.02-0.12) | 0.97<br>(0.94-0.99) | 0.23<br>(0.05-0.54)            | 0.97<br>(0.95-0.99) | 0.23<br>(0.05-0.54) | 0.97<br>(0.95-0.99) |
| Post-op day 3                                               | 0.65<br>(0.42-0.89) | 0.56<br>(0.21-0.86)            | 0.76<br>(0.71-0.81) | 0.07<br>(0.02-0.15) | 0.98<br>(0.95-1.00) | 0.11<br>(0.00-0.48)            | 0.99<br>(0.96-1.00) | 0.20<br>(0.01-0.72) | 0.97<br>(0.95-0.99) |
| Sum of Post CPB/OpCAB and six hours after ICU admission     | 0.81<br>(0.74-0.90) | 0.93<br>(0.66-1.00)            | 0.56<br>(0.51-0.61) | 0.07<br>(0.04-0.12) | 1.00<br>(0.97-1.00) | 0.21<br>(0.05-0.51)            | 0.95<br>(0.92-0.97) | 0.13<br>(0.03-0.34) | 0.97<br>(0.95-0.99) |
| Product of Post CPB/OpCAB and six hours after ICU admission | 0.81<br>(0.71-0.89) | 0.86<br>(0.57-0.98)            | 0.65<br>(0.60-0.70) | 0.08<br>(0.04-0.14) | 0.99<br>(0.97-1.00) | 0.21<br>(0.05-0.51)            | 0.98<br>(0.96-0.99) | 0.25<br>(0.05-0.57) | 0.97<br>(0.95-0.99) |
| Maximum of Post CPB/OpCAB and six hours after ICU admission | 0.82<br>(0.73-0.90) | 1.00<br>(0.77-1.00)            | 0.44<br>(0.39-0.49) | 0.06<br>(0.03-0.10) | 1.00<br>(0.98-1.00) | 0.29<br>(0.08-0.58)            | 0.92<br>(0.88-0.94) | 0.11<br>(0.03-0.26) | 0.97<br>(0.95-0.99) |
| Sum of all timepoints                                       | 0.82<br>(0.71-0.91) | 0.93<br>(0.66-1.00)            | 0.59<br>(0.54-0.64) | 0.08<br>(0.04-0.13) | 1.00<br>(0.98-1.00) | 0.14<br>(0.02-0.43)            | 0.99<br>(0.97-1.00) | 0.29<br>(0.04-0.71) | 0.97<br>(0.95-0.98) |
| Maximum of all timepoints                                   | 0.82<br>(0.72-0.91) | 1.00<br>(0.77-1.00)            | 0.18<br>(0.15-0.23) | 0.04<br>(0.02-0.07) | 1.00<br>(0.95-1.00) | 0.57<br>(0.29-0.82)            | 0.81<br>(0.77-0.85) | 0.10<br>(0.04-0.19) | 0.98<br>(0.96-0.99) |

**Figure S1.** Area under the receiver operating characteristic (AUROC) curves for the baseline clinical model (AUROC [95% CI] = 0.86 [0.77-0.94]) and the model that includes the maximum of the post cardiopulmonary bypass/OpCAB timepoint and the six-hours after ICU admission timepoint, in addition to baseline clinical factors (AUROC = 0.90 [0.82-0.96]).

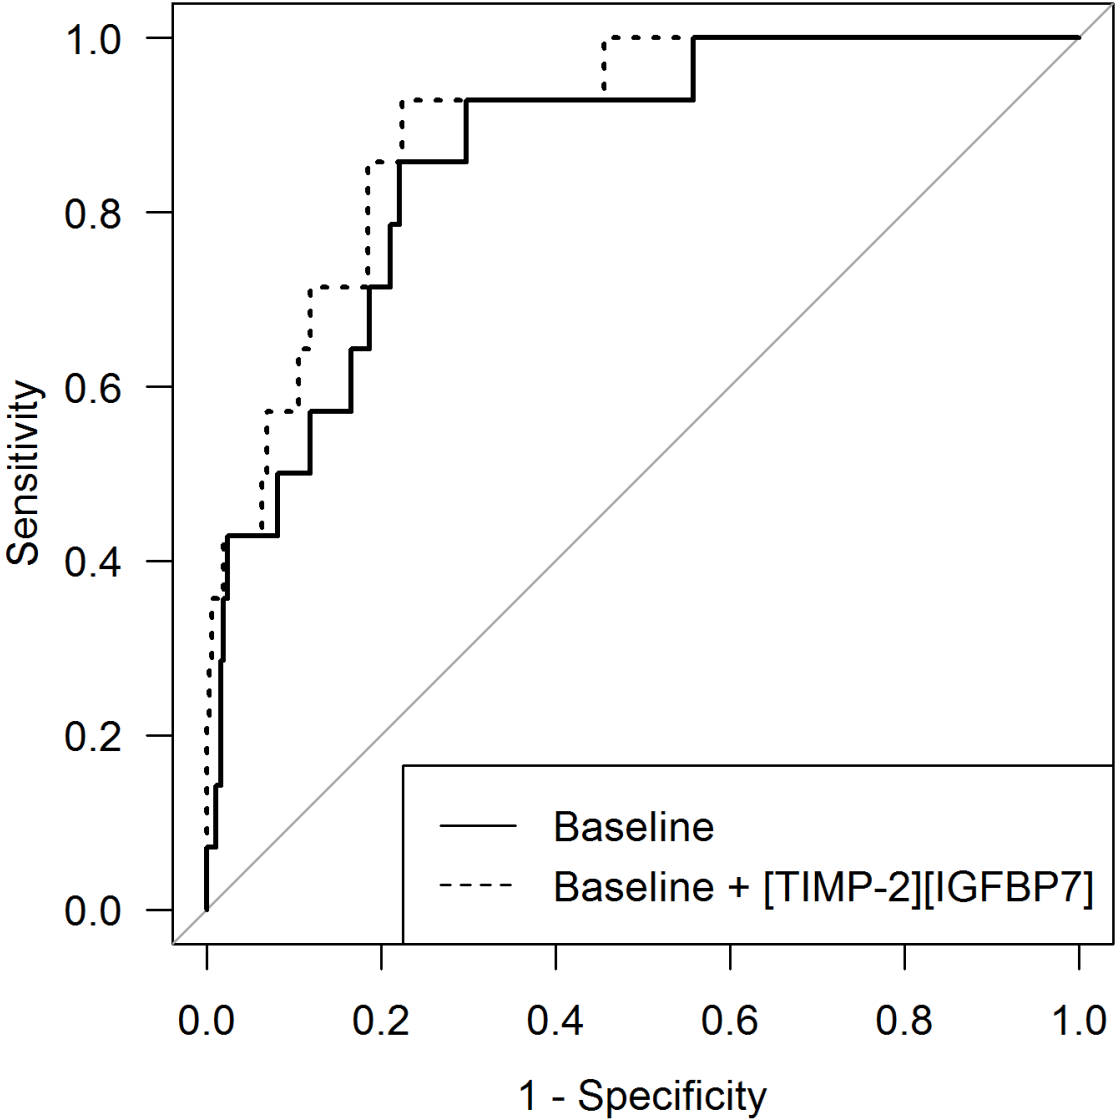

Supplement: NIHMS1516612-supplement-2.pdf [file NIHMS1516612-supplement-2.pdf]
